# Supplementary material for: Searching for New Genetic Biomarkers of Axial Spondyloarthritis
Source: MDPI journal article supplement (doi:10.3390/jcm11102912), 2022-05-20
Supplement: s1 [file s1]

**Table S1.** Associations between ERAP1, TNFRSF1B, TNFRSF1A, FCGR2A genotypes and clinical parameters.

|                         |    | N  | Min  | Q1    | Median | Q3    | Max   | IQR  | P <sup>a</sup> | P <sup>b</sup> |               |
|-------------------------|----|----|------|-------|--------|-------|-------|------|----------------|----------------|---------------|
| ERAP1 rs2287987         |    |    |      |       |        |       |       |      |                |                |               |
| CRP at baseline [mg/l]  | AA | 69 | 0.42 | 4.29  | 10.8   | 26.8  | 99.8  | 22.5 | 0.032          | AA vs AG + GG  | 0.012         |
|                         |    |    |      |       |        |       |       |      |                | AA + AG vs GG  | 0.916         |
|                         | AG | 33 | 0.35 | 1.19  | 2.77   | 19.2  | 68.8  | 18.0 |                | AA + GG vs AG  | 0.009         |
|                         |    |    |      |       |        |       |       |      |                | AA vs AG       | 0.010         |
|                         | GG | 3  | 3.64 | 3.64  | 4.83   | 37.93 | 37.9  | 34.3 |                | AG vs GG       | 0.319         |
|                         |    |    |      |       |        |       |       |      |                | AA vs GG       | 0.735         |
| CRP at 12th week [mg/l] | AA | 69 | 0.13 | 0.66  | 1.65   | 5.66  | 26.7  | 5.0  | 0.020          | AA vs AG + GG  | 0.066         |
|                         |    |    |      |       |        |       |       |      |                | AA + AG vs GG  | -             |
|                         | AG | 33 | 0.1  | 0.33  | 0.78   | 2.075 | 108.3 | 1.75 |                | AA + GG vs AG  | 0.018         |
|                         |    |    |      |       |        |       |       |      |                | AA vs AG       | 0.025         |
|                         | GG | 2  | 5.75 | 5.75  | 10.2   | 14.7  | 14.7  | 8.94 |                | AG vs GG       | -             |
|                         |    |    |      |       |        |       |       |      |                | AA vs GG       | -             |
| CRP at 24th week [mg/l] | AA | 68 | 0.08 | 0.578 | 1.83   | 5.73  | 37.6  | 5.15 | 0.015          | AA vs AG + GG  | 0.043         |
|                         |    |    |      |       |        |       |       |      |                | AA + AG vs GG  | 0.134         |
|                         | AG | 32 | 0.13 | 0.335 | 0.635  | 2.77  | 27.5  | 2.43 |                | AA + GG vs AG  | 0.009         |
|                         |    |    |      |       |        |       |       |      |                | AA vs AG       | 0.014         |
|                         | GG | 3  | 2.77 | 2.77  | 4.6    | 10.2  | 10.2  | 7.47 |                | AG vs GG       | 0.048         |
|                         |    |    |      |       |        |       |       |      |                | AA vs GG       | 0.224         |
| TNFRSF1B rs1061622      |    |    |      |       |        |       |       |      |                |                |               |
| VAS at baseline [mm]    | TT | 58 | 45   | 70    | 80     | 85    | 100   | 15   | 0.003          | TT vs TG + GG  | 0.653         |
|                         |    |    |      |       |        |       |       |      |                | TT + TG vs GG  | <b>0.001*</b> |
|                         | TG | 34 | 48   | 70    | 79     | 82.3  | 93    | 12.3 |                | TT + GG vs TG  | 0.144         |
|                         |    |    |      |       |        |       |       |      |                | TT vs TG       | 0.451         |
|                         | GG | 8  | 80   | 84.8  | 93     | 95    | 100   | 10.3 |                | TG vs GG       | <b>0.001*</b> |
|                         |    |    |      |       |        |       |       |      |                | TT vs GG       | <b>0.002*</b> |
| BASDAI at baseline      | TT | 64 | 4.05 | 5.9   | 7.3    | 8.2   | 9.8   | 2.3  | 0.015          | TT vs TG + GG  | 0.696         |
|                         |    |    |      |       |        |       |       |      |                | TT + TG vs GG  | <b>0.005*</b> |
|                         | TG | 34 | 3.95 | 5.84  | 7.05   | 7.93  | 9.2   | 2.09 |                | TT + GG vs TG  | 0.236         |
|                         |    |    |      |       |        |       |       |      |                | TT vs TG       | 0.523         |
|                         | GG | 8  | 6.35 | 7.78  | 8.6    | 9.3   | 10    | 1.53 |                | TG vs GG       | <b>0.004*</b> |
|                         |    |    |      |       |        |       |       |      |                | TT vs GG       | 0.009         |
| TNFRSF1A rs767455       |    |    |      |       |        |       |       |      |                |                |               |
| CRP at baseline [mg/l]  | TT | 34 | 0.68 | 4.25  | 18.2   | 40.1  | 99.8  | 35.9 | 0.017          | TT vs TC + CC  | 0.009         |
|                         |    |    |      |       |        |       |       |      |                | TT + TC vs CC  | 0.991         |
|                         | TC | 46 | 0.35 | 1.69  | 5.29   | 14.8  | 59.7  | 13.1 |                | TT + CC vs TC  | 0.014         |
|                         |    |    |      |       |        |       |       |      |                | TT vs TC       | <b>0.006*</b> |
|                         | CC | 25 | 0.76 | 2.79  | 7.85   | 18.7  | 51.9  | 15.9 |                | TC vs CC       | 0.231         |
|                         |    |    |      |       |        |       |       |      |                | TT vs CC       | 0.120         |
| ESR at baseline [mm/h]  | TT | 33 | 1    | 13    | 32     | 50    | 93    | 37   | 0.027          | TT vs TC + CC  | 0.013         |
|                         |    |    |      |       |        |       |       |      |                | TT + TC vs CC  | 0.991         |
|                         | TC | 46 | 2    | 4.75  | 15.5   | 32.3  | 70    | 27.5 |                | TT + CC vs TC  | 0.020         |
|                         |    |    |      |       |        |       |       |      |                | TT vs TC       | 0.010         |
|                         | CC | 25 | 2    | 8     | 22     | 38.5  | 64    | 30.5 |                | TC vs CC       | 0.257         |
|                         |    |    |      |       |        |       |       |      |                | TT vs CC       | 0.132         |
| FCGR2A rs1801274        |    |    |      |       |        |       |       |      |                |                |               |
| ESR at 24th week [mm/h] | AA | 38 | 1    | 3     | 9.5    | 16.8  | 57    | 13.8 | 0.045          | AA vs AG + GG  | 0.064         |
|                         |    |    |      |       |        |       |       |      |                | AA + AG vs GG  | 0.030         |
|                         | AG | 50 | 1    | 3     | 5      | 12.8  | 46    | 9.75 |                | AA + GG vs AG  | 0.829         |

|    |    |   |   |   |      |    |      |          |       |
|----|----|---|---|---|------|----|------|----------|-------|
|    |    |   |   |   |      |    |      | AA vs AG | 0.230 |
|    |    |   |   |   |      |    |      | AG vs GG | 0.103 |
| GG | 16 | 1 | 2 | 3 | 6.75 | 45 | 4.75 | AA vs GG | 0.013 |

---

*N*: number of patients in groups; CRP: C-reactive protein; ESR: Erythrocyte Sedimentation Rate; VAS: Visual Analogue Scale; BASDAI: Bath Ankylosing Spondylitis Disease Activity Index; Q1: lower quartile; Q3: upper quartile; IQR: interquartile range  
<sup>a</sup> Kruskal-Wallis test  
<sup>b</sup> Mann-Whitney test,  $p < 0.008$  was considered significant (according to Bonferroni correction) and marked by asterisk (\*)
